1 **Evidence for Early European Neolithic Dog Dispersal: New Data on South-Eastern**

2 **European subfossil dogs from Prehistory and Antiquity Ages**

3 **Short title: South-Eastern European subfossil dogs**

4

5

6 Miroslav Marinov<sup>1</sup>, Iskra Yankova<sup>1</sup>, Boyko Neov<sup>1</sup>, Maria Petrova<sup>3</sup>, Nikolai Spassov<sup>2</sup>, Peter  
7 Hristov<sup>1</sup>, Georgi Radoslavov<sup>1\*</sup>

8 <sup>1</sup>Department of Animal Diversity and Resources, Institute of Biodiversity and Ecosystem  
9 Research, Bulgarian Academy of Sciences, Sofia, Bulgaria;

10 <sup>2</sup>Palaeontology and Mineralogy Department, National Museum of Natural History, Bulgarian  
11 Academy of Sciences, Sofia, Bulgaria.

12 <sup>3</sup>Department of Structure and Function of Chromatin, Institute of Molecular Biology, Bulgarian  
13 Academy of Sciences, Sofia, Bulgaria;

14

15

16

17

18

19 Corresponding author: Georgi Radoslavov, Department of Animal Diversity and Resources,

20 Institute of Biodiversity and Ecosystem Research, Bulgarian Academy of Sciences, “Acad. G.

21 Bonchev” Str., Bl. 25, Sofia, 1113, Bulgaria, Tel: + 359 2 979 2327; E-mail:

22 [gradoslavov@gmail.com](mailto:gradoslavov@gmail.com)

24  
25  
26  
27  
28  
29  
30  
31  
32  
33  
34  
35  
36  
37  
38  
39  
40  
41  
42  
43  
44  
45  
46  
47  
48

## Abstract

### **Objectives**

The history of dog domestication is still under debate, but doubtlessly, it is a process of an ancient partnership between dogs (*Canis familiaris*) and humans. Although data on ancient DNA dog diversity are scarce, it is clear that several regional dog populations had been formed in Eurasia up to the Holocene. During the Neolithic Revolution and the transition from hunter-gatherer to farmer societies, followed by civilization changes in the Antiquity period, the dog population structure also changed. This process was due to replacement with newly formed dog breeds.

### **Methods**

In this study we have presented for the first time mitochondrial data about South-Eastern Europe (the Balkans) ancient dog remains from the Early Neolithic (8 000 years BP) to the Late Antiquity ages (up to 3th century AD). A total of 25 samples were analyzed using the mitochondrial D-loop region (HVR1).

### **Results**

The results have shown the presence of A (70%) and B (25%) clades throughout the whole investigated period. In order to clarify the position of our results within the ancient dog population in Eneolithic Eurasia, we performed phylogenetic analysis with the available genetic data sets. This data revealed a similarity of the Bulgarian dogs' structure to that of ancient Italian dogs (A, B, and C clades), which suggests a new prehistoric and historic Mediterranean dog population. A clear border can be seen between South-European genetic dog structure, on the one hand, and, on the other hand, Central-West (clade C), East (clade D) and North Europe (clades A and C). This corresponds to genetic data for European humans during the same period without admixture between dog populations.

### **Conclusions**

49        Our data have shown for the first time the presence of clade B in ancient Eurasia. This is not  
50        unexpected as the B haplogroup is widely distributed in extant Balkan dogs and wolves. The  
51        presence of this clade both in dogs and in wolves on the Balkans may be explained with  
52        hybridization events before the Neolithic period. The spreading of this clade across Europe  
53        together with the A clade is related to the possible dissemination of newly formed dog breeds  
54        from Ancient Greece, Thrace and the Roman Empire.

55

56        **Key words:** ancient DNA, population structure, dog, the Balkans

58

## Introduction

59 In recent years, it has been increasingly assumed that the dog's domestication was a very  
60 early process that began at the end of the Pleistocene. The dog's domestication is apparently  
61 linked to the gradual synanthropy of wolf populations as a result of commensal relations  
62 between man and wolf at the end of the late Pleistocene [1,2]. The first data from dog-like  
63 remains came from the Razboinichya Cave in the Altai Mountains of Siberia (33 000 years BP)  
64 and the Goyet cave in Belgium (c. 31 700 BP) [3,4]. Genetic studies of these remains have not  
65 shown any similarity to recent wolves and dogs [3,5]. The Pleistocene domestication cannot be  
66 accepted as absolutely certain, given the large morphological variability of Pleistocene wolves  
67 [6].

68 Therefore, we can assert that signs of safe substitution are found only in the borderline  
69 between the Paleolithic and the Mesolithic. Since then, the main questions have been related to  
70 the place and time of origin, domestication and influence of hybridization events between  
71 domesticated dog and local wolf populations.

72 According to mitochondrial DNA (mtDNA) studies, there are six main clades, assigned A,  
73 B, C, D, E, and F, and many sub-clades, characterizing dog population in the world [7-9]. Clades  
74 A, B, and C are the most widely distributed (95.9%) among recent dog populations, while D,  
75 E, and F have regional geographic distribution [10]. For example, in West Eurasia, the sub-  
76 haplogroup A1 is with a frequency of about 70%, while clades B and C are present with  
77 frequencies of 20% and 10%, respectively [7,9]. In the Middle East, this proportion is almost  
78 the same but with more worldwide presented sub-haplogroups [11].

79 Analysis of ancient dog DNA is still scarce and does not include many geographic regions.  
80 Despite this, available data reveal quite different population structure concerning present day  
81 dogs. These alterations are due to the emergence of the first civilizations as well as the early  
82 historical and modern human migration. For example, pre-Columbian American dogs were

83 identical to East-Eurasian (Siberian) dogs which are nowadays mixed with West-Eurasian dogs,  
84 after the Age of Discovery (15th century) [5,12,13]. Similarly, in the Pacific, including the  
85 islands of Polynesia, a post-Lapita dog introduction from southern Island Southeast Asia has  
86 been suggested [14].

## 87 **Ancient dog populations from Europe**

88 One of the most investigated regions concerning ancient dog mtDNA is Europe. Up to date,  
89 most studies have shown that old Europe (from the Pleistocene to the Holocene) may be divided  
90 into at least three or four regions of dog populations based on mtDNA analysis. One of them is  
91 Central and West Europe, including France, Germany, Switzerland, and Hungary. Typical for  
92 these parts of Europe is the prevalence of clade C (over 80%) mixed with clade D [5,13,15,16]  
93 (Fig 1a). The second region includes Eastern Europe (Romania, Moldova, Ukraine) up to Iran  
94 and the Middle East. The basic clade in these regions is D (over 90%), and there are traces of  
95 A and C [5,13,16,17]. In Northern Europe (Scandinavia and Estonia) there are clades A and C  
96 [5,16,18]. Also, the most presentable nowadays clade D is missing [7,19,20]. There has been  
97 only one study from the Mediterranean region concerning ancient dog populations [21]. This  
98 research includes only five samples (three wolves and two dogs), and the obtained results have  
99 shown the presence of clades A, B, and C [5,21]. Most of the authors have suggested that clade  
100 A is associated with Neolithic farmer migration in ancient Europe from the Middle East, while  
101 clade B probably originated from Southeastern Europe (the Balkans and the Apennines)  
102 because of the high frequency of extant Balkan wolves with similar haplotypes [5,21-24].

103 All these data from pre-historic Europe have shown a dramatic difference between ancient  
104 and present day dog populations. This change may be explained with the replacement of local  
105 dog breeds with more improved breeds from the South part of Europe, the Mediterranean  
106 region, and the Near East during the Late Antiquity and the Medieval ages [21].

## 107 **Ancient dog populations in Central Asia and pre-Columbian**

### 108 **Americas**

109 Another well studied area of research is related to the region of pre-Columbian America and  
110 the migration of Paleolithic hunter-gatherers and their dogs from Siberia via the North Asian  
111 Mammoth steppe via the Beringia land bridge roughly 14 000 years ago [25,26]. MtDNA  
112 studies of ancient dogs from Siberia and the Americas reveal a similar genetic profile, i.e. the  
113 presence of specific A1 and A2 subclades [5,12,16,27,28] (Fig 1a). A similar mtDNA profile  
114 with a prevalence of clade A has been found in ancient dogs from Turkmenistan (Central Asia)  
115 [16].

### 116 **Ancient dog populations in South-Eastern Asia and the Pacific**

117 The third most studied geographic regions are South-Eastern Asia and the Pacific Islands,  
118 including Australia (Fig 1a). Characteristic of these regions is the Neolithic pottery Lapita  
119 culture, where a Pacific Ocean people flourished in the Pacific Islands from about 3 600 BP to  
120 about 2 500 BP from continental Asia. A basic characteristic of dog populations in this region  
121 is the prevalence of sub-clade A2 and a few cases of B and A4's [13,14,29]. These sub-  
122 haplogroups are typical for recent South-Eastern Asia but with different frequencies [7,8].  
123 Interestingly, the sub-clade B2 is different from West Eurasian dog's B1 myotypes [9].

124 In conclusion, dogs are a very interesting object, because of the direct evidence of historical  
125 human migration processes. However, there are still many uninvestigated geographic regions.  
126 White spots of ancient dog genetic diversity are, for example, the Mediterranean region,  
127 including South Europe, the Near East, and the Fertile Crescent, and also other domesticated  
128 centers in Central and East Asia (China and India), etc.

129 Our study tries to enrich data for ancient South-Eastern Europe – the Balkan Peninsula  
130 (Bulgarian) dogs, based on mtDNA (partial D-loop region, HVR1) analysis. We have

131 performed phylogenetic analysis to compare our results with other ancient and recent European  
132 dog and wolf populations.

133

134

## Results

135

### **Phylogenetic analysis and haplogroup classification**

136

137

138

139

140

141

142

143

144

Ancient DNA was successfully amplified in 21 out of 25 samples tested. Out of the 21 sequences, 16 were used for phylogenetic analysis, because only they covered informative sites for haplogroups assignment. From them, eleven sequences were assigned to clade A (68.7%), four belonged to clade B (25.0%), and one to clade D (6.2%). These sequences have informative sites from position 15 595 bp to 15784 bp (189 bp) of the first amplified region of HVR1 according to ref. sequence EU789787 [8]. We analyzed only this region, because most of the ancient dog sequences available in GenBank also used this region as the most informative one for haplogroups assignment. Four of our not assigned sequences have only the third amplified fragment of HVR1, which is not declarative concerning haplogroup assignment (S1Table).

145

146

147

148

All analyzed sequences in this study belonging to clade A and B are equally dispersed in investigated regions in Bulgaria as well as in historical time. In contrast, the highly dispersed in ancient East Europe clade D was found only in one sample from the Late Antiquity period (S1 Table).

149

### **Comparative analyses of ancient dog haplotypes and Bulgarian**

150

### **samples**

151

152

153

About 230 ancient dog sequences available in GenBank and Dryad Digital Repository package [17,40] were explored by Reduce-median network analysis. In this analysis, ancient dog samples were from ancient Eurasia, pre-Columbian America and Pacific pre-Lapita period

154 (Fig 1b; S1 Table). All haplotypes were separated into four main clades: A, B, C and D. There  
155 is a clear geographical differentiation between the distribution of C and D clades, which are  
156 specific for Central, West and East Europe. Clade A is split into many sub-clades, i.e. A2 for  
157 South-Eastern Asia and the Pacific, A1 for Siberia and Central Asia, and pre-Columbian  
158 America, A4 and A6 for North Europe (Scandinavia), and A and B clade are characteristic for  
159 the Mediterranean region (Italy, Bulgaria and Israel). Similarly, PCA analysis grouped all  
160 ancient samples into five distinct clades (Fig 1c).

## 161 **Comparative analysis among ancient and recent Balkan dogs as** 162 **well as recent gray wolf haplotypes distribution**

163 About 120 haplotypes including recent Balkan dogs and wolves populations as well as  
164 ancient Bulgarian and Italian samples were analyzed by Median-joining network (S1 Fig). All  
165 samples (dogs and wolves) were explored as described previously from position 15 595 bp to  
166 15784 bp (189 bp) of the first amplified region of HVR1 according to ref. sequence EU789787  
167 [8], and haplotypes were determined according to the classifications of [9] and [34] as well as  
168 MitoToolPy program [35]. The results show that most of the ancient and recent dog haplotypes  
169 from clades A and B have similar or identical to recent Balkan wolves haplotypes. The Balkan  
170 wolves haplotypes are not grouped into C and D clades. Moreover, there are wolves haplotypes  
171 which not include present-day dog haplotypes.

172

## 173 **Discussion**

174 **Balkan Neolithic and Chalcolithic periods: specifics of human**  
175 **societies and understanding of early European farmer migrations**  
176 **ways from the Near East.**



177 The South-Eastern Europe includes the Balkan Peninsula and the Apennines. These  
178 geographical regions are important points concerning human history and migration processes  
179 as well as the accompanying domesticated animals and the crops from the Near East. It is well  
180 known that during the Last Glacial Maximum (22 000–14 000 BP) the sea level of the World  
181 Ocean was about 125 meters lower than nowadays [41]. Therefore, large territories of land were  
182 connected. For example, the Balkan Peninsula was connected terrestrially to Anatolia via the  
183 Sea of Marmara in the east and also to a large part of the Apennines via the Adriatic Sea in the  
184 west [21]. This enormous contact zone was a precondition for the free movement of human  
185 societies but also of wild animal populations during the Mesolithic the and Early Neolithic  
186 periods.

187 Therefore, Early Neolithic cultures from the Fertile Crescent and Anatolia were directly  
188 connected to South-Eastern Europe (especially during the Late Neolithic period 8 000 BP).  
189 During this period three migration ways for dissemination of Neolithic farmers into Europe  
190 existed – the Mediterranean, the Balkans (the Danube River) and the North Pontic steppes (Fig  
191 1a).

192 The most recent study on human population from the Mesolithic to the Iron Age has revealed  
193 that human populations on the Balkans (South-Eastern Europe) and in Anatolia shared a similar  
194 genetic profile in contrast with North Pontic Steppe Neolithic humans and those in Central and  
195 West Europe [42]. Despite the similarity of the Eastern and the South-Eastern Neolithic and  
196 Chalcolithic cultures, these genetic data suggest different migration routes (the Mediterranean,  
197 the Danubean and the North Pontic) of farmers from the Fertile Crescent. The data of this  
198 research clearly show human migrations from North to East direction on the Balkans during the  
199 Chalcolithic and the Bronze Ages, but also dissemination of South-Eastern human farmers into  
200 the Central Europe region (LBK culture – Austria, 5100–5000 BC). This evidence also suggests  
201 different migration routes for livestock like cattle, goats, and sheep [35,43].

202 In the Neolithic to the Chalcolithic Age livestock farming on the Balkans was related related  
203 to intensive cattle, goats and sheep breeding [31,44,45], with a prevalence of cattle (over 30%)  
204 in the North Balkans and domination of sheep breeding in the south. This animal husbandry  
205 was accompanied everywhere by the presence in the studied settlements of ancient races of  
206 dogs, which in later epochs passed into specially selected breeds.

207 The processes of domestication and dog breed creation continued later up to the Early and  
208 the Late Antique periods. At this time the first data on dog breeds on the Balkans were described  
209 by Aristoteles [46] and later, in the Roman empire, by Xenophon (Cynegeneticus, 2,000 years  
210 ago). The authors commented on dozens of different dog breeds, including guard, hunting, and  
211 companion dogs.

## 212 **Population structure of ancient dogs from the Neolithic period**

213 The question of dog origin is geographically, genetically, and archaeologically complex.  
214 Ancient DNA analysis from relevant areas of the world should allow better understanding of  
215 the evolution of dogs from their predecessor, the gray wolf. In this respect, there are a few  
216 hypotheses about dog domestication and spreading. Based on recent mtDNA haplotypes  
217 distribution, the common opinion is that in the center of domestication the genetic diversity is  
218 the highest, thus there must be a high level of various haplotypes from different clades. Due to  
219 this reason, the East Asian and the Near East (Anatolian and Fertile Crescent) centers were  
220 proposed for dog origin centers [8,11]. The migration routes from the centers of domestication  
221 are characterized by a bottleneck type of dissemination which is unique for bordered regions  
222 worldwide like Europe, North Africa, Pacific Islands etc. For example, the genetic profile of  
223 recent European dogs is characterized by the prevalence with various A1 and B1 sub-clades  
224 [9,47], while dogs in South-West Asia (Anatolia and Fertile Crescent) have a mixed profile  
225 with other A and B sub-clades [11]. Recent European C1, D1 and D2 subclades are considered

226 as regional specific sub-clades and as a “relict” from ancient time for dog-wolf hybridization  
227 [7,8].

228 In contrast to molecular data about recent dogs, evidence for ancient dogs, though still  
229 scarce, showed homogeneous and simple genetic structure of prehistory dog populations (Fig.  
230 1a). In West, Central and North Europe there is a prevalence of C clade, in East Europe and the  
231 Middle East (Iran) – of clade D, in Southeastern Asia, Australia, and the Pacific Islands – a  
232 prevalence of the specific sub-clade A2, and in Siberia, Central Asia (Turkmenistan), and pre-  
233 Columbian America – of specific A1 sub-clades [5,12-16,27,28] (Fig 1b). Key geographic  
234 regions for understanding dog history like South Europe and the Near East, North Africa, and  
235 ancient Central and South Asia (China and India) are still uninvestigated.

236 The prehistoric Neolithic Balkan dogs were primitive in terms of stage of domestication, as  
237 their morphological features were relatively close to the ancestral wolf morphology as the  
238 “*vlasac*” type [30,31,48]. Our data have shown a prevalence of dog A and B clades from the  
239 Neolithic to the Antique period. During this time, the proportion of these clades was preserved  
240 with minor changes. Despite the small size of the investigated samples, these results are in  
241 direct contrast with the border regions in the north direction where the Danube River serves as  
242 a border region. The investigated ancient dog samples from Romania, Moldova, and Ukraine  
243 (9 000 – 5 000 BP) showed a prevalence of C and D clades [17], (S1 Table). Otherwise, our  
244 data correlate with ancient samples from Italy and Israel, where, despite the small size of  
245 samples, a prevalence of clades A and C for Italy has been revealed [5,16,17,21]. These data,  
246 even insufficient, have suggested that A clade dog populations replaced old Central European  
247 ones. It is possible that this genetic profile is associated with the Fertile Crescent and Anatolian  
248 ancient dogs.

249 **Clade B, a possibility of South-Eastern European (Balkans) origin**  
250 **of dogs from local wolves predecessors.**

251 In modern dogs, clade B is widely distributed with a frequency of over 20% [7,9]. This clade  
252 consists of two sub-clades, B1 and B2. The B1 sub-clade is disseminated worldwide with a  
253 frequency of about 21%, while the B2 sub-clade is with regional distribution mainly in Eastern  
254 Asia with a frequency of about 10 % [9,47]. Although there is a high frequency of clade B in  
255 modern dogs, in ancient samples up to date, these subhaplogroups have been observed very  
256 rarely, about 1 %. There is one sample in France and Turkmenistan, and there are a few samples  
257 from South-Eastern Asia and Oceania [14,16,17]. In our sample sets B1 sub-clade is with a high  
258 frequency (over 20%). This haplogroup is common among the Neolithic, the Chalcolithic and  
259 the Bronze Age samples but is also present in the Antique period with almost equal frequency.

260 These data are not very surprising because clade B is widely and unusually distributed in  
261 recent Balkan wolf population, identified in several researches [5,22-24,37]. These studies  
262 proposed that clade B possibly originated from the Balkans, although there are some cases of  
263 B type wolves worldwide. In a previous study of Bulgarian native dogs, clade B was observed  
264 with about 20 % [38].

265 The only investigation concerning South Europe about ancient dogs and wolves has been  
266 carried out by [21 In this study they investigated three wolves or large canids from 14 000 – 10  
267 000 years ago and two medium size dogs from 4 000 years ago. One of the wolves' samples  
268 was assigned as clade B (PIC-2), while others belonged to A (PIC-3) and C (PIC-1) clades (S1  
269 Fig). The authors hypotesized about the possibile origin of B clades from the Balkans due to  
270 the high frequency of B type Balkan wolves. In addition, the authors defined that in South-  
271 Eastern Europe (the Balkans and the Apennines) there is a high frequency of clade B in gray  
272 wolf population. The discovery of clade B in the primitive dog race (intermedius-vlasac  
273 morpho-group) from the Early Neolithic of Slatina (Sofia) presented new arguments in favor

274 of the morphologically [30,48] and genetically [21] argued hypothesis that some  
275 prehistoric to recent dog races (races which have the B-clade) originated on the Balkans.

276 Taken together, all data about ancient dogs' populations up to now, even though partly  
277 insufficient, have revealed a massive replacement of ancient local dogs before the Antique  
278 period and nowadays. These processes may easily be explained with the creation of new dog  
279 breeds in South Europe during the Antique and the Roman Empire periods, which disseminated  
280 and replaced local dogs in north direction in Medieval Europe. A similar process was also  
281 observed in different time and geographic regions during the Ages of Discovery, where C and  
282 B sub-clades changed the genetic structure of local American dogs via the introduction of extant  
283 European dog breeds.

284

285

## Conclusion

286 In conclusion, our data have enriched the information about ancient dogs' structure,  
287 especially in South-Eastern Europe. The results from the Neolithic, the Chalcolithic and the  
288 Antique periods in Bulgaria, have demonstrated the dominance of A (70%) and B (25%) dog  
289 clades and homogenic structures of these haplogroups throughout the whole investigated period  
290 but an absence of clade C and only one case of D clade (late Antique period). These data have  
291 revealed the similarity of the Bulgarian dogs' structure to that of ancient Italian dogs (A, B and  
292 C clades). Also, our data have shown for the first time the presence of clade B in ancient Eurasia.  
293 This is not unexpected because of the fact that the B haplogroup was widely distributed in extant  
294 Balkan wolves and dogs. The presence of this clade both in wolves and in dogs on the Balkans  
295 may be explained with hybridization events before the Neolithic period. Spreading of this clade  
296 across Europe together with the A clade is related to possible dispersal dissemination of newly  
297 formed dog breeds from Ancient Greece, Thrace and the Roman Empire.

298

299

300

## Materials and Methods

301 **Archeological samples collection, ancient DNA isolation and PCR**

302 **amplification and sequencing**

303 Twenty-five samples (bones and dental material) from ancient dogs from the collection of  
304 NMNH-BAS were studied from several archaeological sites: Early Neolithic 8500-7500 BP  
305 (Gradeshnitsa/Malo Pole, Ohoden–Valoga Slatina, Sofia district); Late Neolithic 7500-7000  
306 BP (Topolnica, Promachon and Budzhaka-Sozopol); Early Chalcolithic 6950-6500 BP (Okol-  
307 Glava, Gniljane, Sultan (Nevski) Popovo, and Settlement mound Burgas); Late Chalcolithic  
308 6500-6000 BP (Dolnoslav, Varna); Bronze 6000-5000 BP (Urdoviza – Kiten, Baley); Late  
309 antiquity (Kapitan Andreevo, Dyadovo village – Nova Zagora, Charda village, Yambol district,  
310 Trakia motorway, Yambol district, and Academic, Plovdiv) (S1 Table and S1 Fig).

311 The *Canis familiaris* remains were determined and assigned to the two primitive prehistoric  
312 morphotypes (and probable crossbreeds between them), representing the two main  
313 Mesolithic\Neolithic-Chalcolithic canine races of the Balkans that can be called conditionally  
314 *Canis familiaris* “*intermedius*” and *C. f.* “*palustris*”. The mesolithic form “*vlasac*”, described  
315 from Serbia [30] is not different from *C. f. intermedius* and represents a slightly younger form  
316 of the latter, with skull/tooth dimensions that are in general within the lower values of the  
317 individual variations of *C. f. vlasac*, while “*C. f. palustris*” is the more domesticated small form  
318 [31].

319 Ancient DNA isolation and PCR amplification and sequencing were given in the Supporting  
320 Information S1.

321

## 322 **Phylogenetic reconstruction**

323 The obtained sequences were manually edited and aligned by MEGA software version 7.0<sup>32</sup>,  
324 using the dog mtDNA sequence NC\_002008 [33] and EU789787 [8] as a reference. Sequences  
325 were analyzed by polymorphic SNPs, and haplogroups were determined according to [9] and  
326 [34] as well as MitoToolPy program [35], (<http://www.mitotool.org/mp.html>) with reference  
327 sequence EU789787 [8]. The phylogenetic analysis was based on the archaeological dog  
328 samples used in this study as well as on all available in GenBank ancient DNA dog sequences  
329 [5,12-14,16-18,21,27-29,36]. Ancient and recent wolves [5,21-24,37], and the recent Bulgarian  
330 native dog [38] were characterized using network analysis – NETWORK 4.5.1.6 (Fluxus  
331 Technology Ltd.) (available at <http://fluxusengineering.com>).

332 In order to graphically display (and summarize) the mitochondrial relationships among the  
333 analyzed ancient dog populations and all ancient samples available in GenBank, we performed  
334 a principal component analysis (PCA) – a method that considers each haplogroup as a discrete  
335 variable and allows a summary of the initial dataset into principal components (PCs). Principal  
336 component analyses (PCA) were performed using Excel software implemented by XLSTAT,  
337 as described elsewhere [39]. The PCA were carried out considering all available ancient dog  
338 sample worldwide.

339 The obtained sequences included in this study were deposited in the National Center for  
340 Biotechnology Information (NCBI) GenBank database under accession numbers NCBI:  
341 MH937186–MH937206.

342

343

## 344 **Data availability statement**

345 Consensus sequences from this study are available from the GenBank database (accession  
346 numbers MH937186–MH937206).

347

348

## 349 **Author Contributions**

350 M.M., G.R., and P.H. conceived of and designed the experiments; G.R., P.H., and N.S. wrote  
351 the manuscript text; I.Y. and M.P. performed the experiments; G.R., P.H., M.M., and N.S.  
352 analyzed the data.

353

## 354 **Competing interests**

355 The authors declare no competing interests.



357  
358  
359  
360  
361  
362  
363  
364  
365  
366  
367  
368  
369  
370  
371  
372  
373  
374  
375  
376  
377  
378  
379  
380  
381

## References

1. Sullivan JO. Variability in the wolf, a group hunter. In Hall RL, Sharp HS, editors. *Wolf and Man*. Cambridge: Academic Press; 1978. pp. 31-40.
2. Morey DF, Jeger R. From wolf to dog: Late Pleistocene ecological dynamics, altered trophic strategies, and shifting human perceptions. *Hist Biol*. 2017;29(7):895-903. doi: 10.1080/08912963.2016.1262854
3. Ovodov ND, Crockford SJ, Kuzmin YV, Higham TF, Hodgins GW, van der Plicht J. A 33,000-year-old incipient dog from the Altai Mountains of Siberia: evidence of the earliest domestication disrupted by the Last Glacial Maximum. *PloS one*. 2011;6(7):e22821. doi: 10.1371/journal.pone.0022821
4. Germonpré M, Sablin MV, Stevens RE, Hedges RE, Hofreiter M et al. Fossil dogs and wolves from Palaeolithic sites in Belgium, the Ukraine and Russia: osteometry, ancient DNA and stable isotopes. *J Archaeol Sci*. 2009;36(2):473-90. doi: 10.1016/j.jas.2008.09.033
5. Thalmann O, Shapiro B, Cui P, Schuenemann VJ, Sawyer SK et al. Complete mitochondrial genomes of ancient canids suggest a European origin of domestic dogs. *Science*. 2013;342(6160):871-4. doi: 10.1126/science.1243650
6. Boudadi-Maligne M, Escarguel G. A biometric re-evaluation of recent claims for Early Upper Palaeolithic wolf domestication in Eurasia. *J Archaeol Sci*. 2014;45:80-9. doi: 10.1016/j.jas.2014.02.006
7. Savolainen P, Zhang YP, Luo J, Lundeberg J, Leitner T. Genetic evidence for an East Asian origin of domestic dogs. *Science*. 2002 Nov 22;298(5598):1610-3. doi: 10.1126/science.1073906
8. Pang JF, Kluetsch C, Zou XJ, Zhang AB, Luo LY, Angleby H, Ardalan A, Ekström C, Sköllermo A, Lundeberg J, Matsumura S. mtDNA data indicate a single origin for dogs

- 382 south of Yangtze River, less than 16,300 years ago, from numerous wolves. Molecular  
383 biology and evolution. 2009;26(12):2849-64. doi: 10.1093/molbev/msp195
- 384 9. Duleba A, Skonieczna K, Bogdanowicz W, Malyarchuk B, Grzybowski T. Complete  
385 mitochondrial genome database and standardized classification system for *Canis lupus*  
386 *familiaris*. Forensic Sci Int Genet. 2015;19:123-9. doi: 10.1016/j.fsigen.2015.06.014
- 387 10. Pires AE, Ouragh L, Kalboussi M, Matos J, Petrucci-Fonseca F, Bruford MW.  
388 Mitochondrial DNA sequence variation in Portuguese native dog breeds: diversity and  
389 phylogenetic affinities. J Hered. 2006;97(4):318-30. doi: 10.1093/jhered/esl006
- 390 11. Ardalan A, Kluetsch CF, Zhang AB, Erdogan M, Uhlén M, et al. Comprehensive study  
391 of mtDNA among Southwest Asian dogs contradicts independent domestication of  
392 wolf, but implies dog–wolf hybridization. Ecol Evol. 2011;1(3):373-85. doi:  
393 10.1002/ece3.35
- 394 12. Witt KE, Judd K, Kitchen A, Grier C, Kohler TA, et al. DNA analysis of ancient dogs  
395 of the Americas: Identifying possible founding haplotypes and reconstructing  
396 population histories. J Hum Evol. 2015;79:105-18. doi: 10.1016/j.jhevol.2014.10.012
- 397 13. Frantz LA, Mullin VE, Pionnier-Capitan M, Lebrasseur O, Ollivier M et al. Genomic  
398 and archaeological evidence suggest a dual origin of domestic dogs. Science.  
399 2016;352(6290):1228-31. doi: 10.1126/science.aaf3161
- 400 14. Greig K, Gosling A, Collins CJ, Boocock J, McDonald K, et al. Complex history of dog  
401 (*Canis familiaris*) origins and translocations in the Pacific revealed by ancient  
402 mitogenomes. Sci Rep. 2018;8(1):9130. doi: 10.1038/s41598-018-27363-8
- 403 15. Deguilloux MF, Moquel J, Pemonge MH, Colombeau G. Ancient DNA supports lineage  
404 replacement in European dog gene pool: insight into Neolithic southeast France. J  
405 Archaeol Sci. 2009;36(2):513-9. doi: 10.1016/j.jas.2008.10.011

- 406 16. Pionnier-Capitan, M. La domestication du chien en Eurasie: étude de la  
407 diversité passée, approches ostéoarchéologiques, morphométriques et  
408 paléogénétiques, PhD Dissertation, École normale supérieure (Sciences), 2010
- 409 17. Ollivier M, Tresset A, Frantz LA, Bréhard S, Bălăşescu A, et al. Dogs accompanied  
410 humans during the Neolithic expansion into Europe. *Biol Lett.* 2018;14(10):20180286.,  
411 doi: 10.1098/rsbl.2018.0286
- 412 18. Malmström H, Svensson EM, Gilbert MT, Willerslev E, Götherström A, Holmlund G.  
413 More on contamination: the use of asymmetric molecular behavior to identify authentic  
414 ancient human DNA. *Mol Biol Evol.* 2007;24(4):998-1004. doi:  
415 10.1093/molbev/msm015
- 416 19. Klütsch CF, Seppälä EH, Fall T, Uhlén M, Hedhammar Å et al. Regional occurrence,  
417 high frequency but low diversity of mitochondrial DNA haplogroup d1 suggests a recent  
418 dog-wolf hybridization in Scandinavia. *Anim Genet.* 2011;42(1):100-3, doi:  
419 10.1111/j.1365-2052.2010.02069.x
- 420 20. Adeola AC, Ommeh SC, Song JJ, Olaogun SC, Sanke OJ, et al. A cryptic mitochondrial  
421 DNA link between North European and West African dogs. *J Genet Genomics*  
422 2017;44:163-170, doi: 10.1016/j.jgg.2016.10.008
- 423 21. Verginelli F, Capelli C, Coia V, Musiani M, Falchetti M, et al. Mitochondrial DNA  
424 from prehistoric canids highlights relationships between dogs and South-East European  
425 wolves. *Mol Biol Evol.* 2005;22(12):2541-51. doi: 10.1093/molbev/msi248
- 426 22. Vilà C, Savolainen P, Maldonado JE, Amorim IR, Rice JE et al. Multiple and ancient  
427 origins of the domestic dog. *Science.* 1997;276(5319):1687-9. doi:  
428 10.1126/science.276.5319.1687
- 429 23. Randi E, Lucchini V, Christensen MF, Mucci N, Funk SM et al. Mitochondrial DNA  
430 variability in Italian and East European wolves: detecting the consequences of small

- 431 population size and hybridization. *Conserv Biol.* 2000;14(2):464-73. doi:  
432 10.1046/j.1523-1739.2000.98280.x
- 433 24. Koblmüller S, Vilà C, Lorente-Galdos B, Dabad M, Ramirez O, et al. Whole  
434 mitochondrial genomes illuminate ancient intercontinental dispersals of grey wolves  
435 (*Canis lupus*). *J Biogeogr.* 2016;43(9):1728-38. doi: 10.1111/jbi.12765
- 436 25. Goebel T, Waters MR, O'rourke DH. The late Pleistocene dispersal of modern humans  
437 in the Americas. *Science.* 2008;319(5869):1497-502. doi: 10.1126/science.1153569
- 438 26. Moreno-Mayar JV, Potter BA, Vinner L, Steinrücken M, Rasmussen S, et al. Terminal  
439 Pleistocene Alaskan genome reveals first founding population of Native Americans.  
440 *Nature.* 2018;553(7687):203. doi: 10.1126/10.1038/nature25173
- 441 27. Losey RJ, Garvie-Lok S, Leonard JA, Katzenberg M A, Germonpré M, et al. Burying  
442 dogs in ancient Cis-Baikal, Siberia: temporal trends and relationships with human diet  
443 and subsistence practices. *PLoS One.* (2013);8:e63740. doi:  
444 10.1371/journal.pone.0063740.
- 445 28. Bartholdy BP, Murchie TJ, Hacking K, Verwoerd C. Dog days on the Plains: a  
446 preliminary aDNA analysis of canid bones from southern Alberta and Saskatchewan.  
447 *CJA.* (2017);41:46-62,
- 448 29. Greig K, Boocock J, Allen M, Matisoo-Smith E, Walter, R. Ancient DNA Evidence for  
449 the Introduction and Dispersal of Dogs (*Canis familiaris*) in New Zealand. *J Pacific*  
450 *Arch.* 2018l; 9(1).
- 451 30. Bökönyi, S. *Vlasac*: an early site of dog domestication. -In: A. clason (ed.)  
452 *Archaeozoological Studies: Papers of the Archaeozoological Conference 1974,*  
453 *Groningen. Amsterdam - Oxford - New York, 167 - 178. (1975).*
- 454 31. Spassov, N. Iliev, N. CHAPTER XII. 1. Bone remains from domestic and wild animals.  
455 In: Yabalkovo, Vol.1. Edited by: J. Roodenberg, K. Leshtakov, V. Petrova. ATE – Ars

- 456 et Technica Explicatus, SOFIA UNIVERSITY “ST. KLIMENT OHRIDSKI”. Sofia,  
457 (2014).
- 458 32. Kumar S, Stecher G, Tamura K. MEGA7: Molecular evolutionary genetics analysis  
459 version 7.0 for bigger datasets. Mol Biol Evol. 2016;33:1870-1874. doi:  
460 10.1093/molbev/msw054.
- 461 33. Kim KS, Lee SE, Jeong HW, Ha JH. The complete nucleotide sequence of the domestic  
462 dog (*Canis familiaris*) mitochondrial genome. Mol Biol Evol. 1998;10:210-220. doi:  
463 10.1006/mpev.1998.0513.
- 464 34. Song JJ, Wang WZ, Otecko NO, Peng MS, Zhang, Y. P. Reconciling the conflicts  
465 between mitochondrial DNA haplogroup trees of *Canis lupus*. Forensic Sci Int Genet.  
466 2016;23:83-85. doi: 10.1016/j.fsigen.2016.03.008.
- 467 35. Peng MS, Fan L, Shi NN, Ning T, Yao YG. et al. DomeTree: a canonical toolkit for  
468 mitochondrial DNA analyses in domesticated animals. Mol Ecol Resour. 2015;5:1238-  
469 1242. doi: 10.1111/1755-0998.12386.
- 470 36. Malmstrom H, Stora J, Dalen L, Holmlund G, Gotherstrom, A. Extensive human DNA  
471 contamination in extracts from ancient dog bones and teeth. Mol Biol Evol.  
472 2005b;22:2040-2047. doi: 10.1093/molbev/msi195.
- 473 37. Tsuda K, Kikkaw, Y, Yonekawa H, Tanabe Y. Extensive interbreeding occurred among  
474 multiple matriarchal ancestors during the domestication of dogs: evidence from inter-  
475 and intraspecies polymorphisms in the D-loop region of mitochondrial DNA between  
476 dogs and wolves. Genes Genet Syst. 1997;72:229-238.
- 477 38. Marinov M, Teofanova D, Gadjev D, Radoslavov G, Hristov P. Mitochondrial diversity  
478 of Bulgarian native dogs suggests dual phylogenetic origin. PeerJ. 2018;6:5060. doi:  
479 10.7717/peerj.5060.

- 480 39. Achilli A, Olivieri A, Pala M, Metspalu E, Fornarino S. et al. Mitochondrial DNA  
481 variation of modern Tuscans supplementaryorts the near eastern origin of Etruscans.  
482 Am J Hum Genet. 2007;80:759-768. doi: 10.1086/512822.
- 483 40. Ollivier M, Tresset A, Frantz LA, Bréhard S, Bălăşescu A. *et al.* Data from: Dogs  
484 accompanied humans during the Neolithic expansion into Europe. Dryad Digital  
485 Repository. Biol Lett. 2018;14(10). doi.10.5061/dryad.h55p1q5.
- 486 41. Clark PU, Dyke AS, Shakun JD, Carlson AE, Clark J. et al. The Last Glacial Maximum.  
487 Science. 2009;325:710–714. doi: 10.1126/science.1172873.
- 488 42. Mathieson I, Alpaslan-Roodenberg S, Posth C, Szécsényi-Nagy A, Rohland N. et al.  
489 The genomic history of southeastern Europe. Nature. 2018;555::197-203. doi:  
490 10.1038/nature25778.
- 491 43. Lenstra J, Ajmone-Marsan P, Beja-Pereira A, Bollongino R, Bradley D. et al. Meta-  
492 analysis of mitochondrial DNA reveals several population bottlenecks during  
493 worldwide migrations of cattle. Diversity. 2014;6:178-187. doi: 10.3390/d6010178.
- 494 44. Spassov N, Iliev N, Boev Z. Animal remains from the Eneolithic site near the village of  
495 Dolnoslav, Plovdiv District, South Bulgaria. Historia naturalis bulgarica; 2001;13:159-  
496 179.
- 497 45. Spassov, N. & Iliev, N. The animal bones from the prehistoric necropolis near  
498 Durankulak and the latest record of *Equus hydruntinus* Regalia (NE Bulgaria).  
499 Durankulak. 2002;2:249-261.
- 500 46. Kitchell Jr, K. F. Animals in the Ancient World from A to Z. Routledge. 2014)
- 501 47. Fregel R, Suárez NM, Betancor E, González AM, Cabrera VM. et al. Mitochondrial  
502 DNA haplogroup phylogeny of the dog: Proposal for a cladistic nomenclature.  
503 Mitochondrion. 2015;22:75-84. doi: 10.1016/j.mito.2015.04.001.

- 504 48. Dimitrijević V. Vuković S. Was the dog locally domesticated in the Danube Gorges?  
505 Morphometric study of dog cranial remains from four Mesolithic–Early Neolithic  
506 archaeological sites by comparison with contemporary wolves. *Int J Osteoarchaeol.*  
507 2015;25:1-30. doi: 10.1002/oa.2260.  
508  
509  
510

512 Figure caption

513

514 **Figure 1.** Population structure of ancient dogs worldwide based on mtDNA data.

515 a) A world map showing distribution of main haplogroups in ancient dog. The main migration  
516 routes are also shown. b) The reduced median network of the main mtDNA haplotypes from  
517 ancient dogs of different regions of the world, c) Principal components analysis of the main  
518 mtDNA haplotypes from ancient dogs of different regions of the world

519



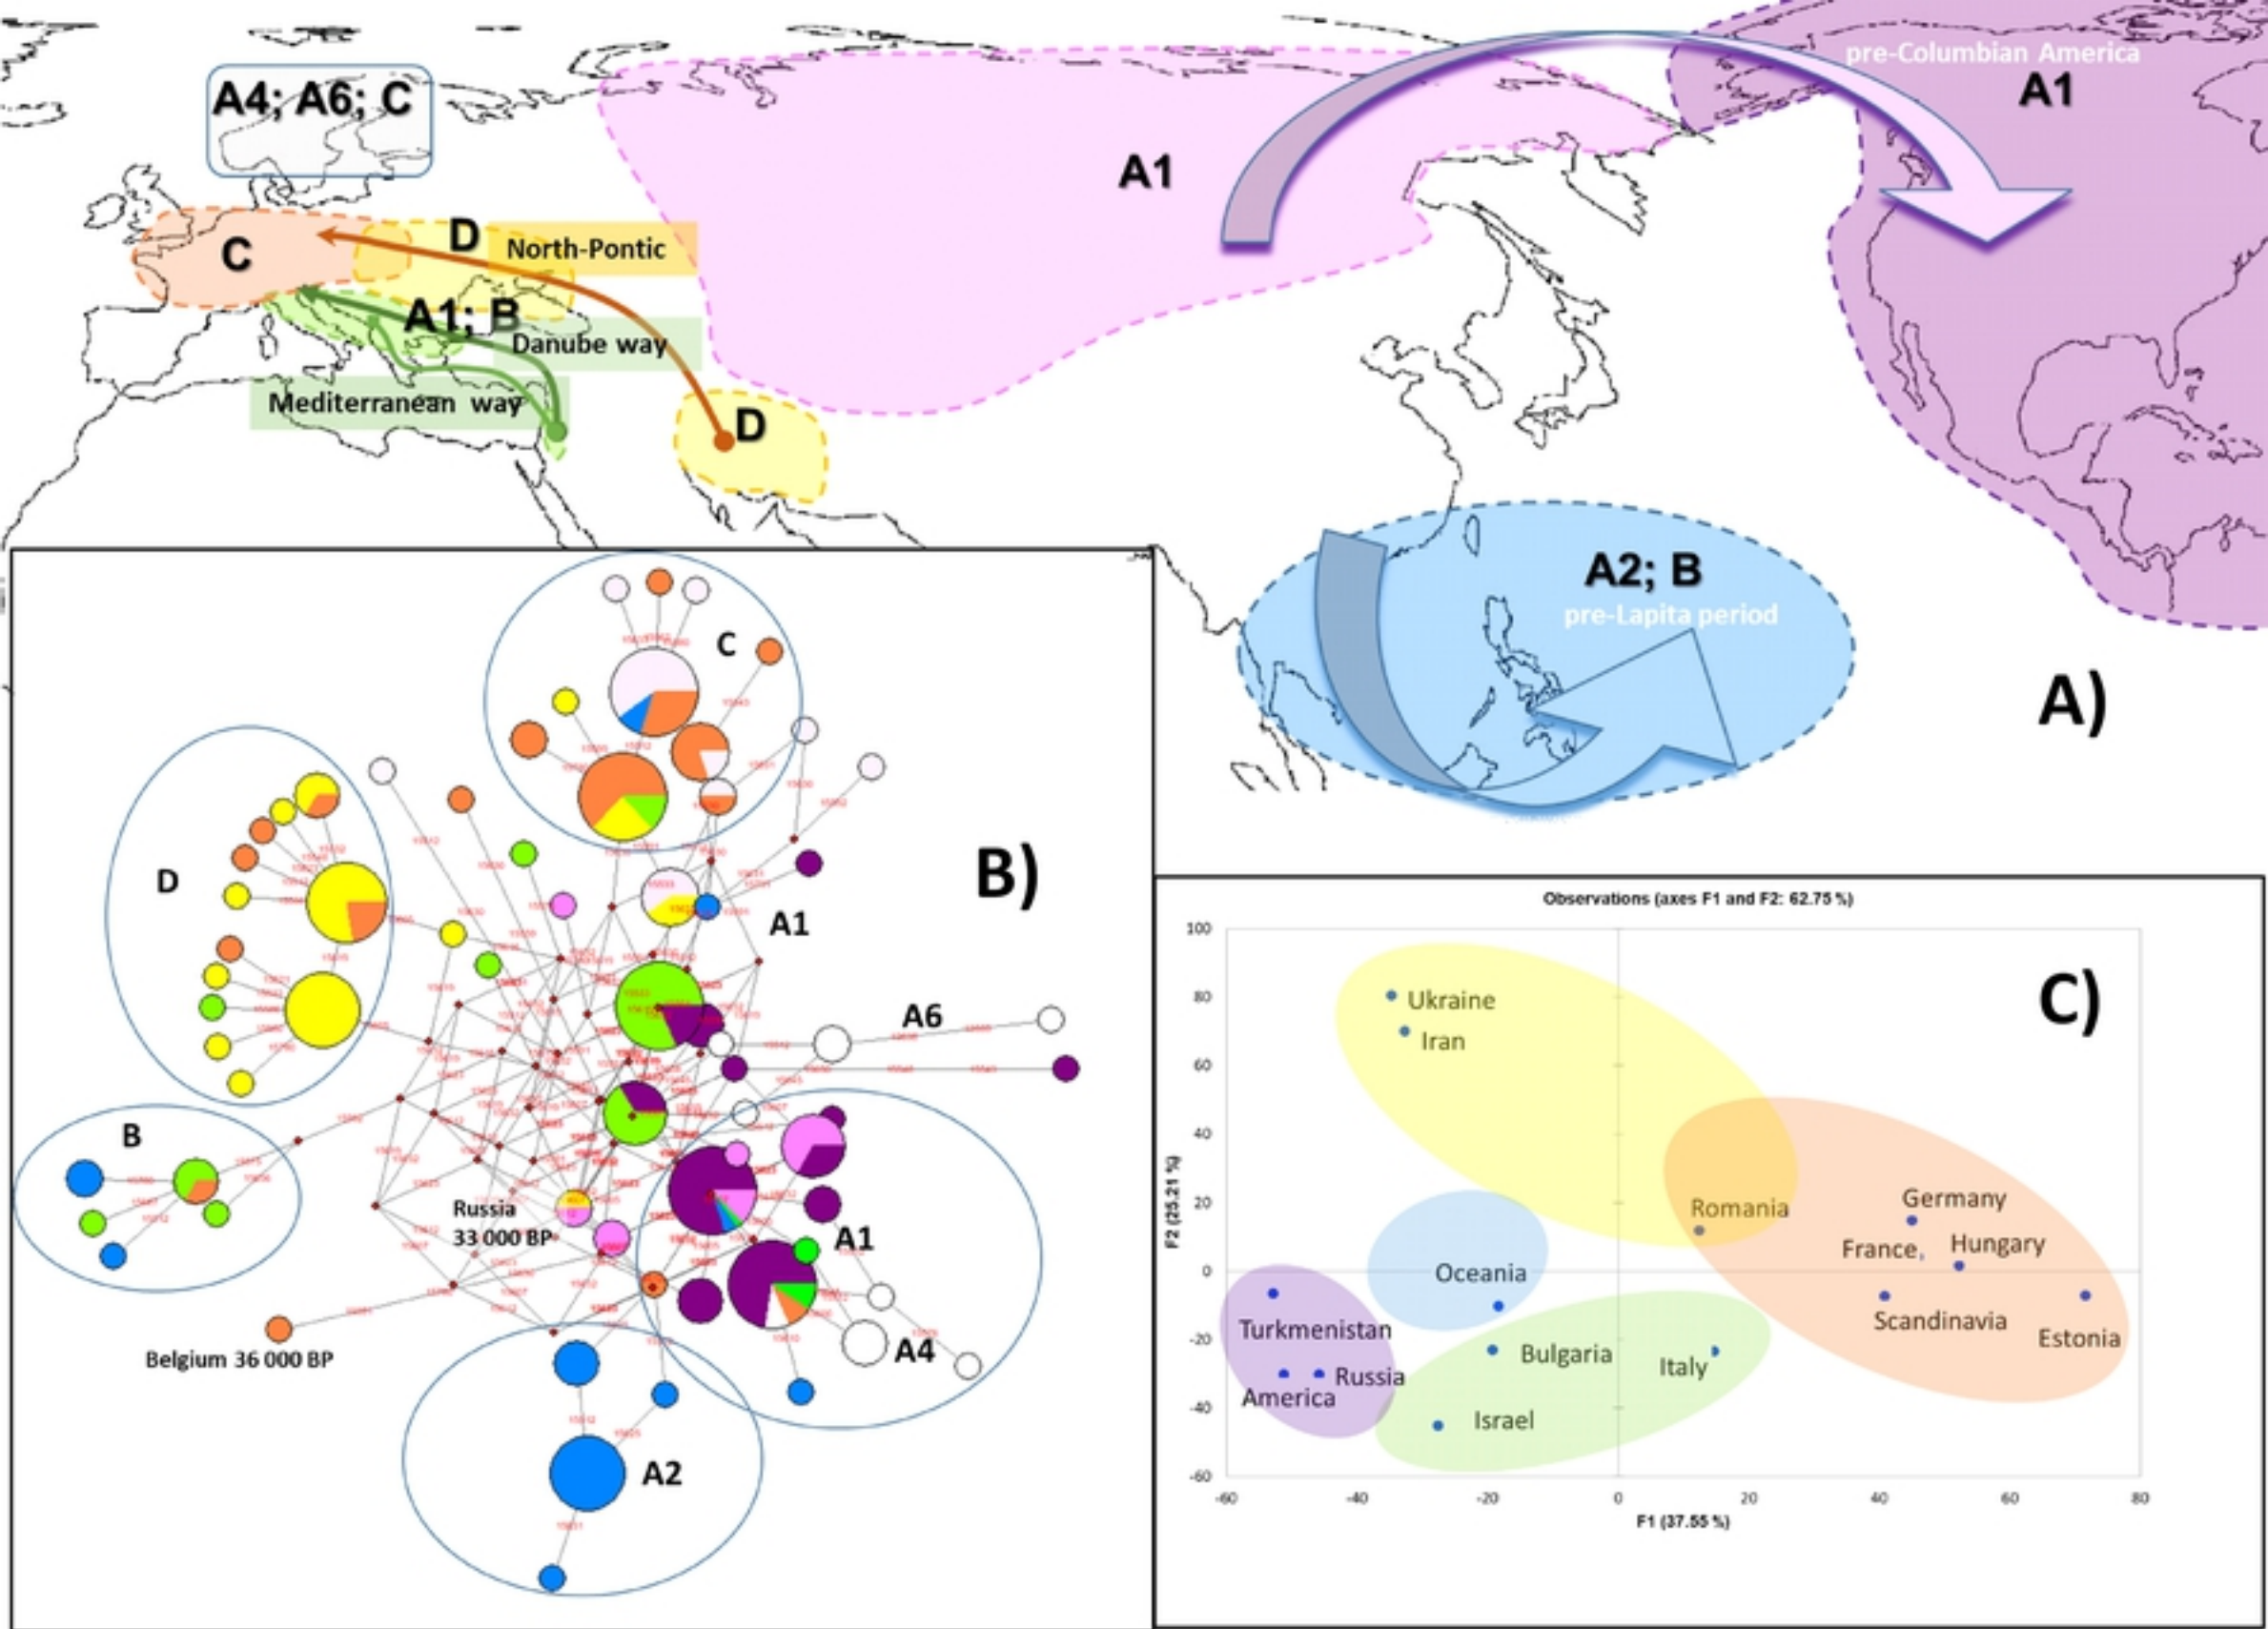

Figure 1
